# Supplementary material
Source: publisher figshare collection journal article supplement (https://sage.figshare.com/ndownloader/files/20161814)
Supplement: Supplementary file 1 [file 20161814]

**Figure 1 Supplement. Annual Trend of Four Financial indicators (2016 dollars)**

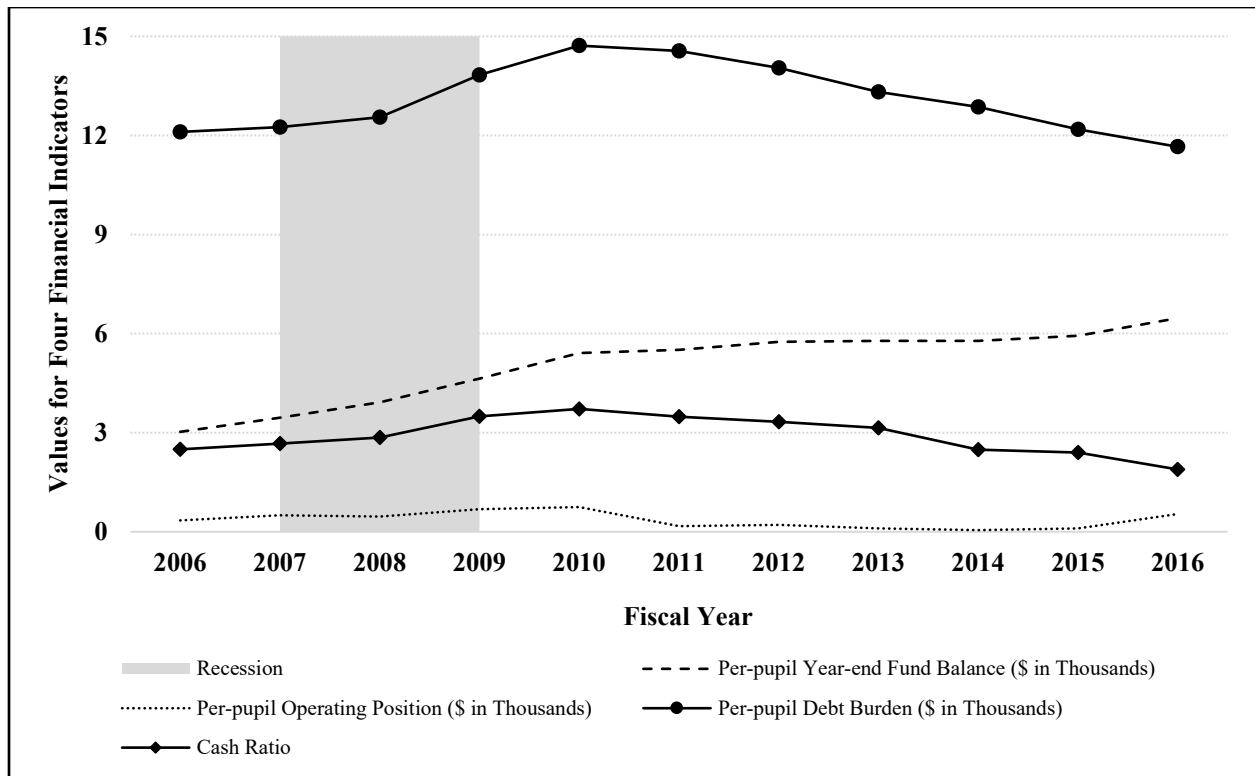

*Note:* The above graphs show average values of financial indicators for each year.
